# Supplementary material for: The Lambda variant of SARS-CoV-2 has a better chance than the Delta variant to escape vaccines
Source: PubMed Central journal article supplement (PMC8404886; doi:10.1101/2021.08.25.457692), 2021-08-26
Supplement: NIHPP2021.08.25.457692V1-supplement-1.pdf [file NIHPP2021.08.25.457692V1-supplement-1.pdf]

## Supplementary Figure

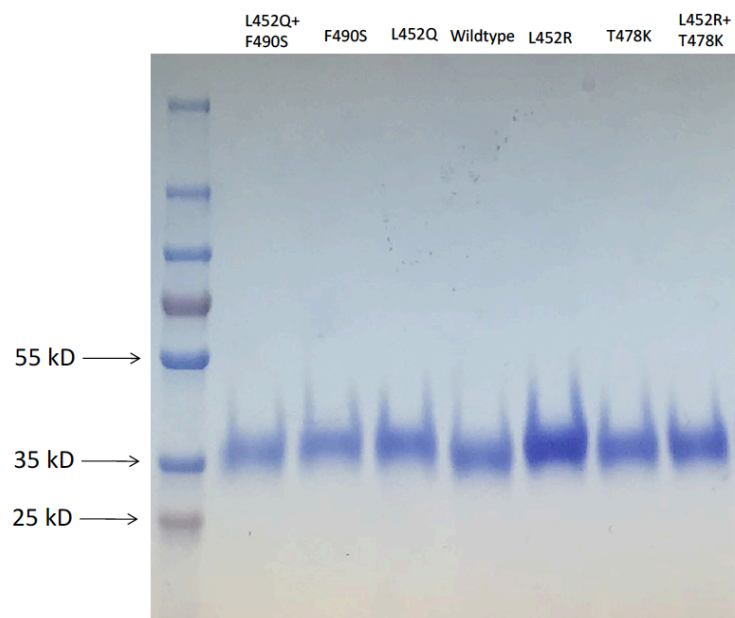

**Figure S1.** RBDs with different mutations were expressed in 293F cells and purified to high purity for further binding assays.
